# Supplementary material
Source: MDPI journal article supplement (https://www.mdpi.com/2073-4344/12/12/1575)
Supplement: s1 [file s1]

*Supplementary Materials*

# Copper–Cerium–Tin Oxide Catalysts for Preferential Oxidation of CO in Hydrogen: Effects of Synthesis Method and Copper Content

Igor Yu. Kaplin \*, Ekaterina S. Lokteva \*, Artem V. Tikhonov, Konstantin I. Maslakov, Oksana Ya. Isaikina and Elena V. Golubina

Department of Chemistry, Lomonosov Moscow State University, Leninskie Gory, 1, bld. 3,  
119991 Moscow, Russia

\* Correspondence: kaplinigormsu@gmail.com (I.Y.K.); e.lokteva@rambler.ru (E.S.L.)

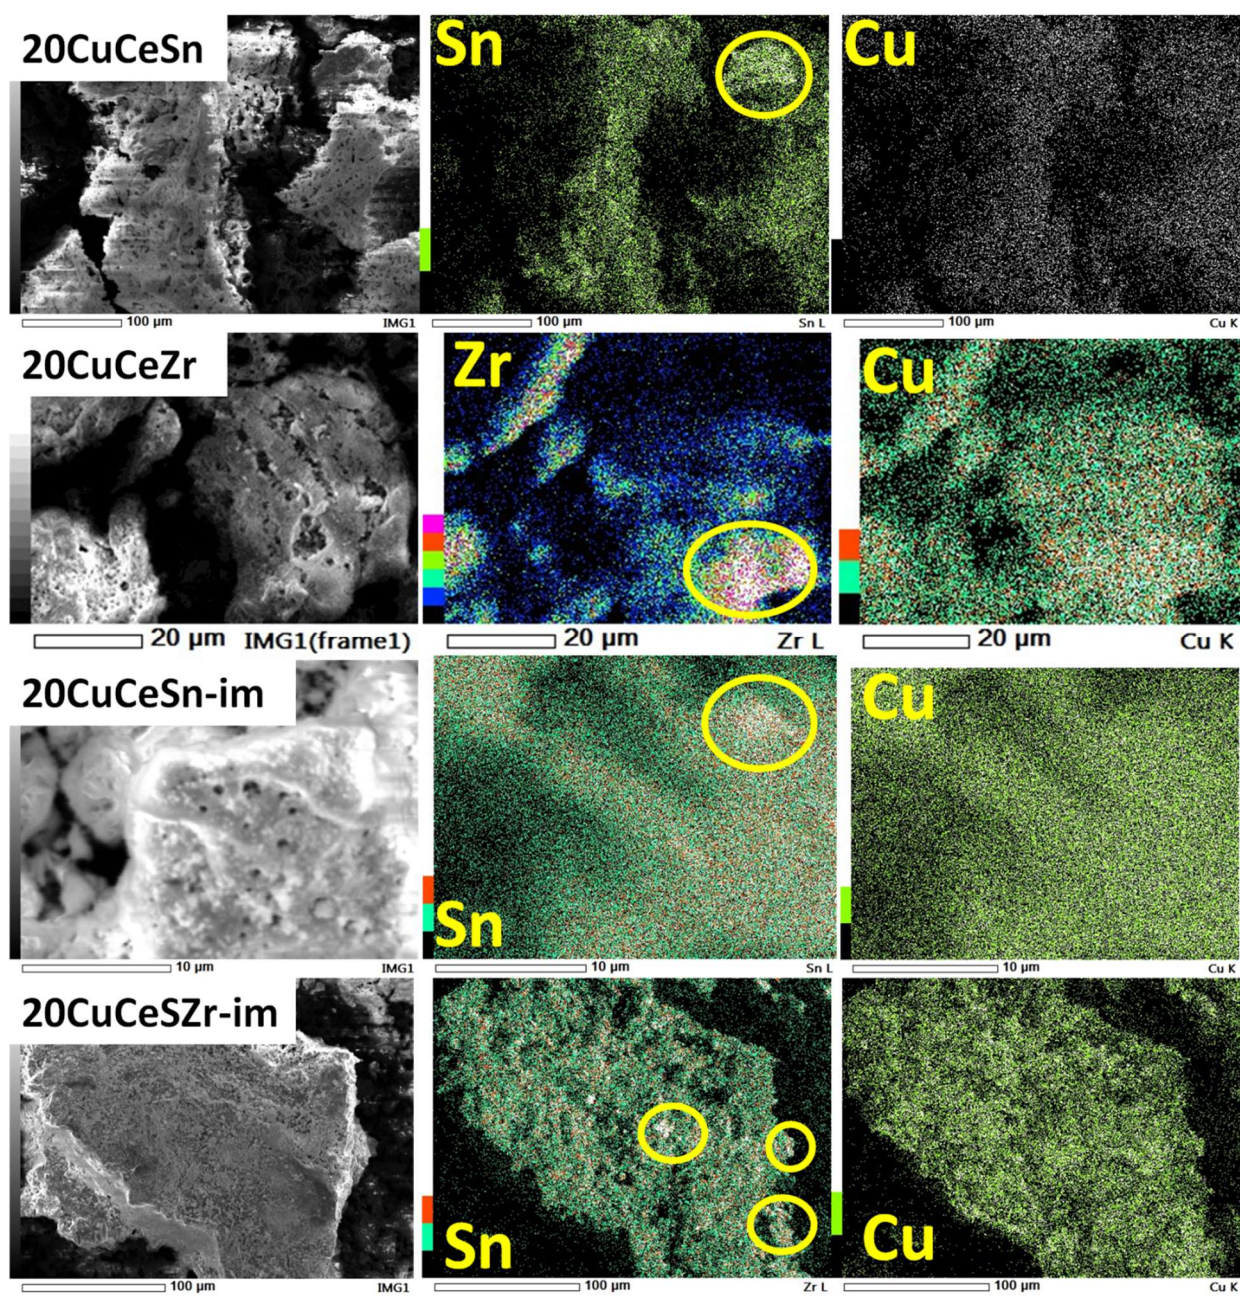

Figure S1. SEM images and EDX elemental mappings of CuCeSn and CuCeZr catalysts.

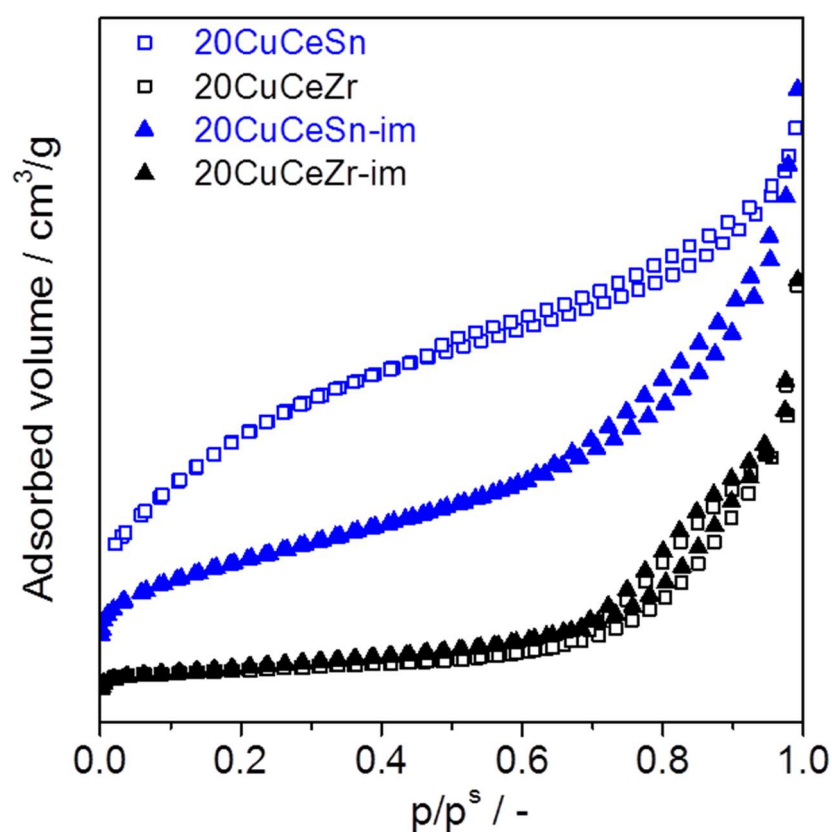

Figure S2. Low temperature nitrogen physisorption isotherms of one-pot synthesized and post-impregnated 20CuCeSn and 20CuCeZr catalysts.

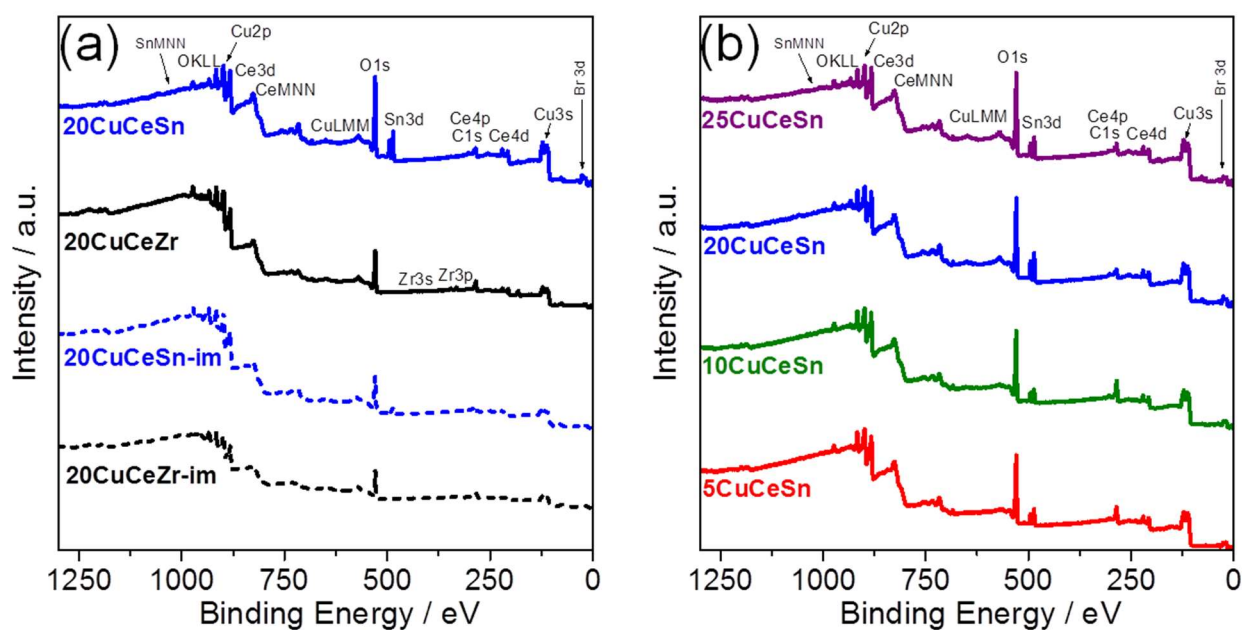



**Figure S3.** Survey XPS spectra of 20CuCeSn and 20CuCeZr catalysts prepared by different methods (a), and one-pot synthesized CuCeSn catalysts with different copper loadings (b).

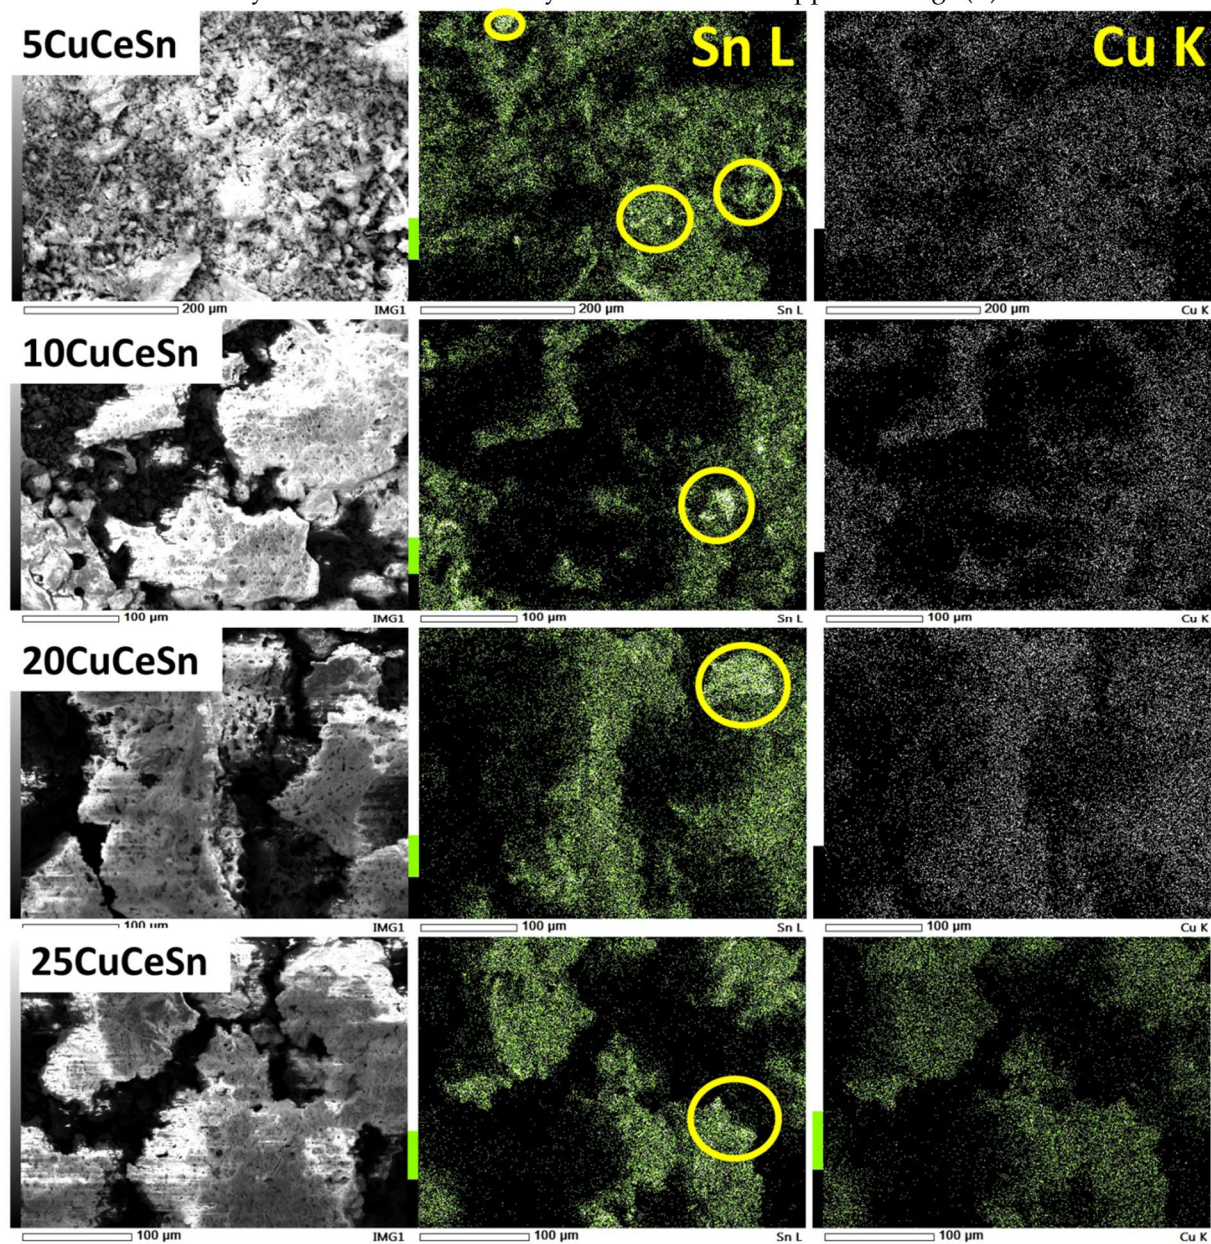

**Figure S4.** SEM images and EDX mappings of one-pot synthesized CuCeSn catalysts with different copper contents.



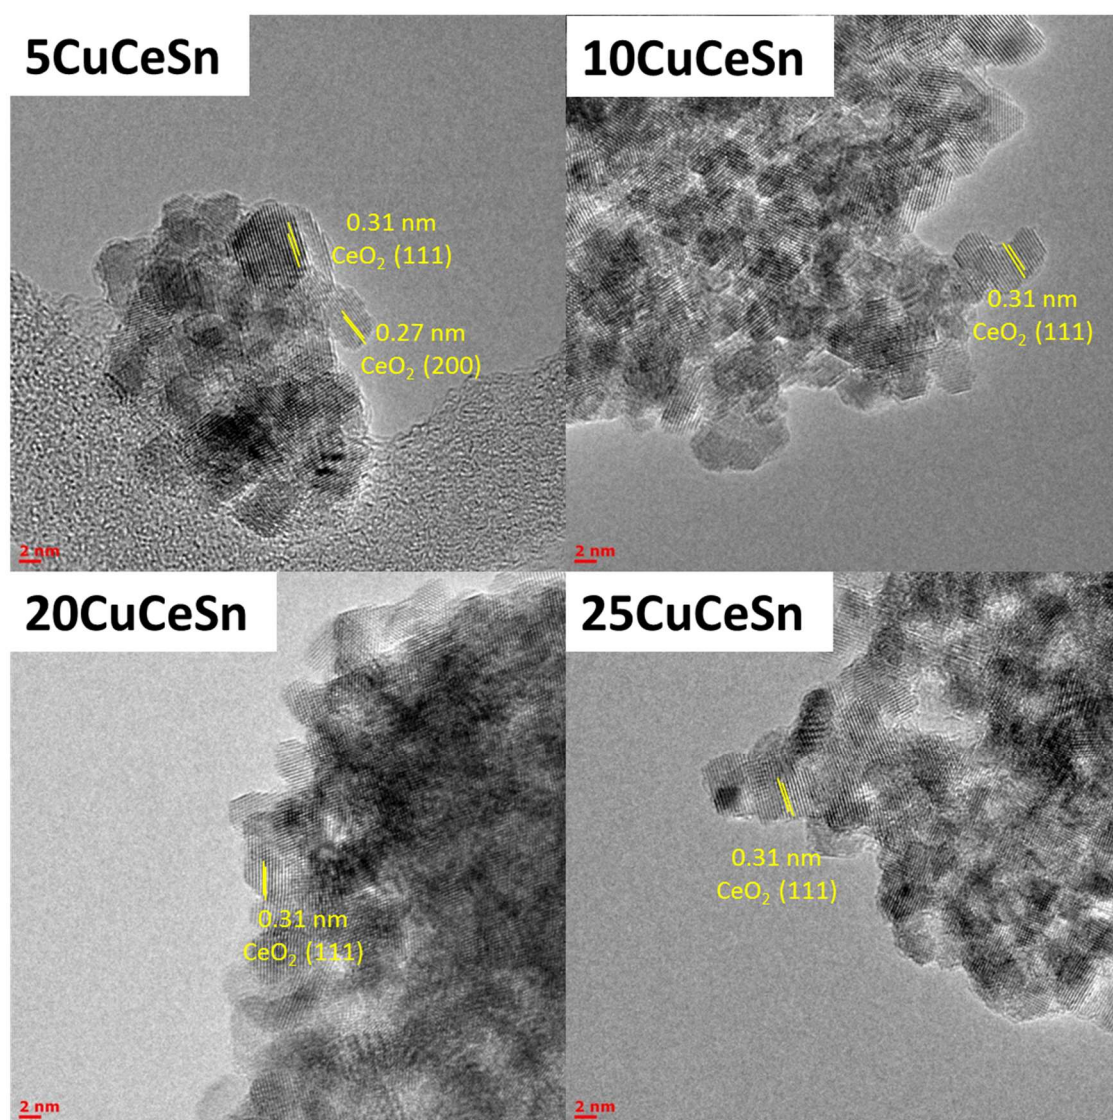

**Figure S5.** HR-TEM images of one-pot synthesized CuCeSn catalysts with different copper contents.
